# Supplementary material
Source: PubMed Central journal article supplement (PMC11438505)
Supplement: EMS198793-supplement-Supplementary_Material.pdf [file EMS198793-supplement-Supplementary_Material.pdf]

# Supplementary Figure S1

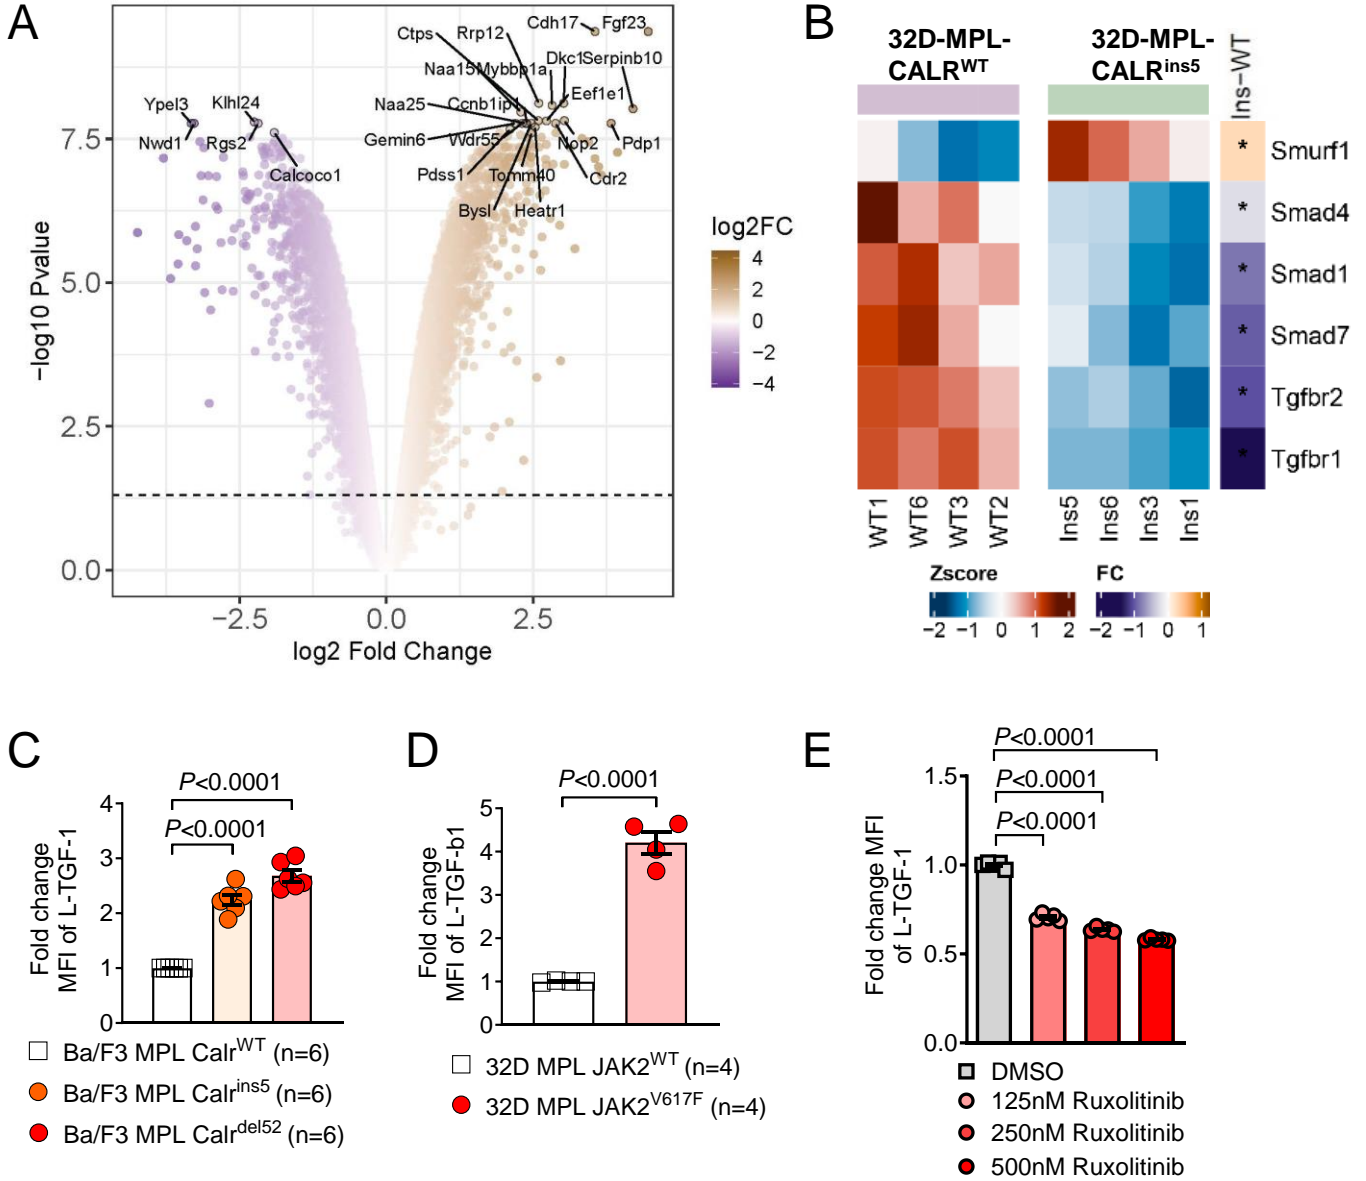

# Supplementary Figure S2

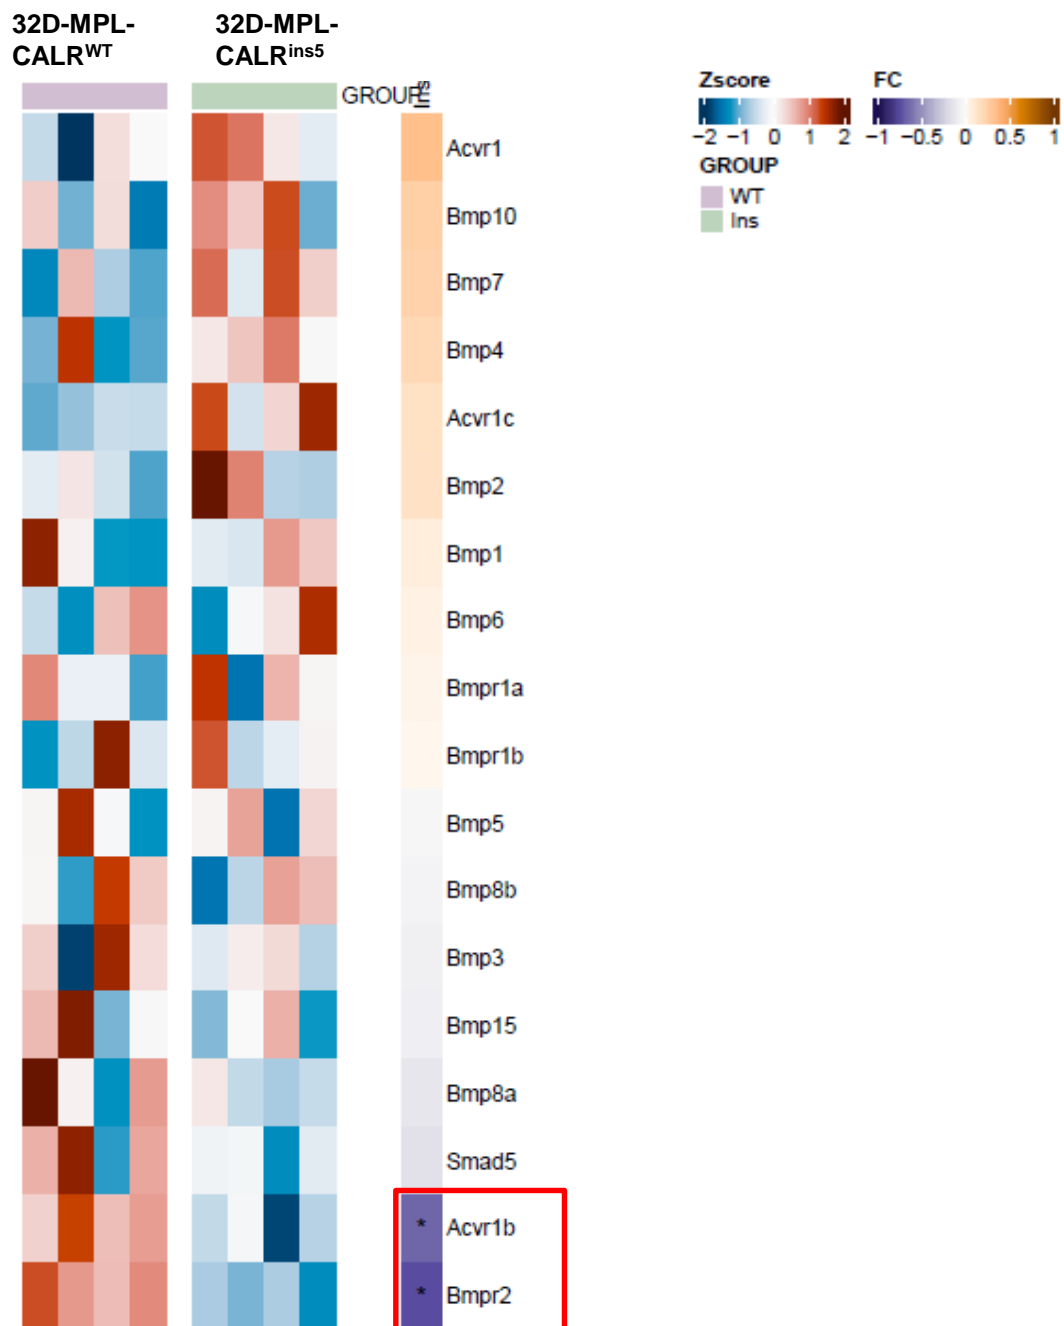

# Supplementary Figure S3

A

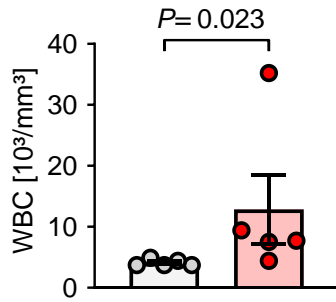

B

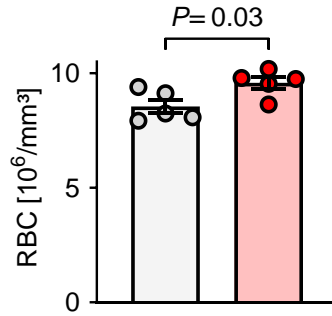

C

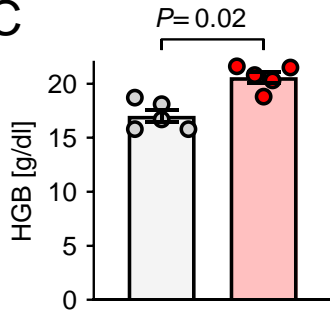

D

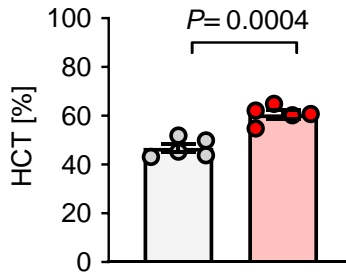

- Empty Vector BM (n=5)
- CALR<sup>del52</sup>-MPL-BM (n=5)

E

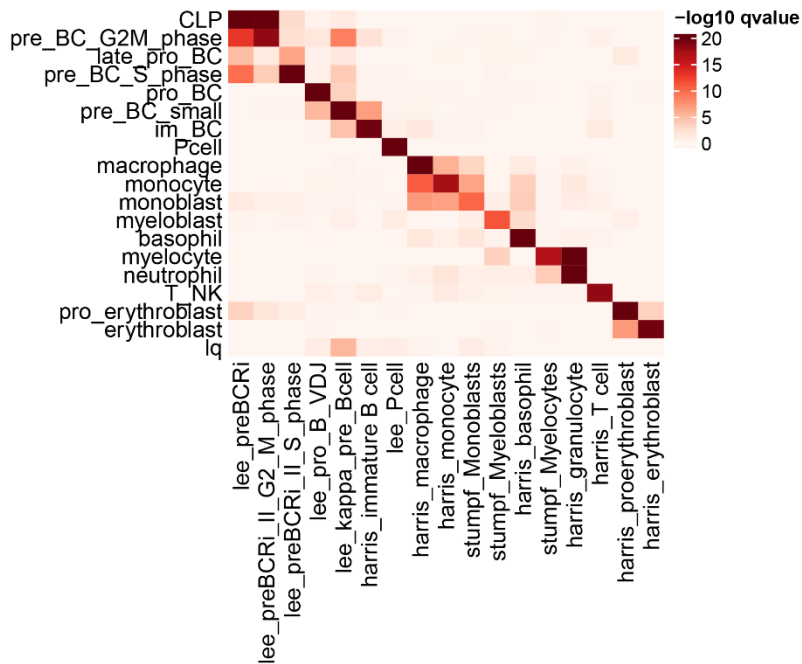

# Supplementary Figure S4

**A**

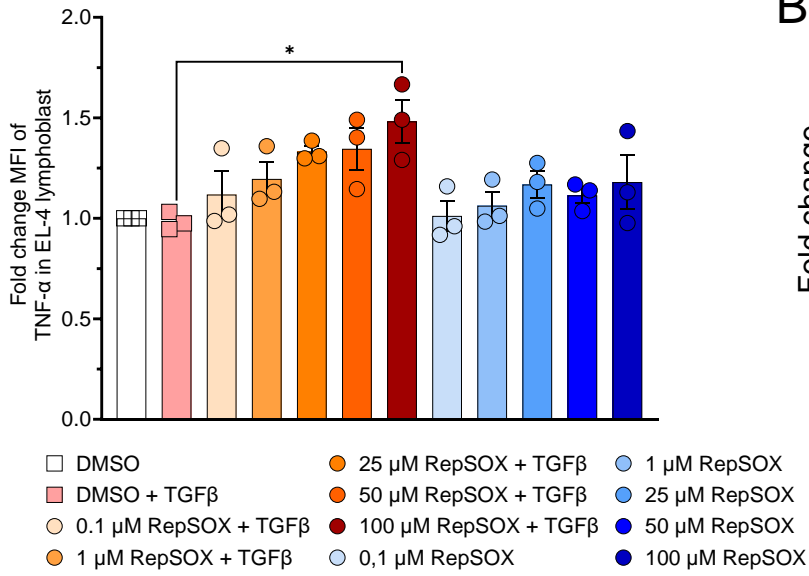

**B**

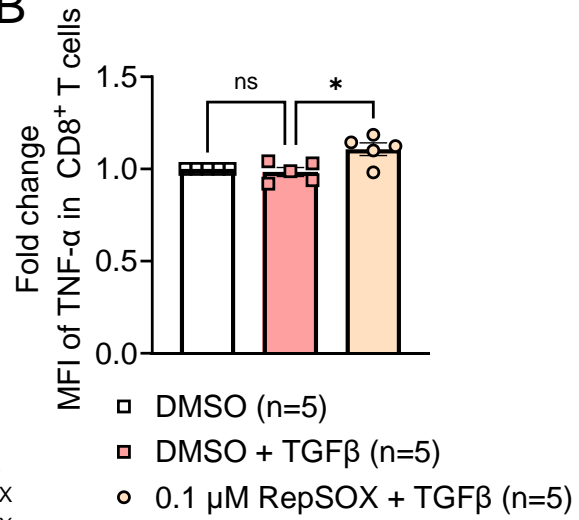

# Supplementary Figure S5

## A

Before T cell depletion

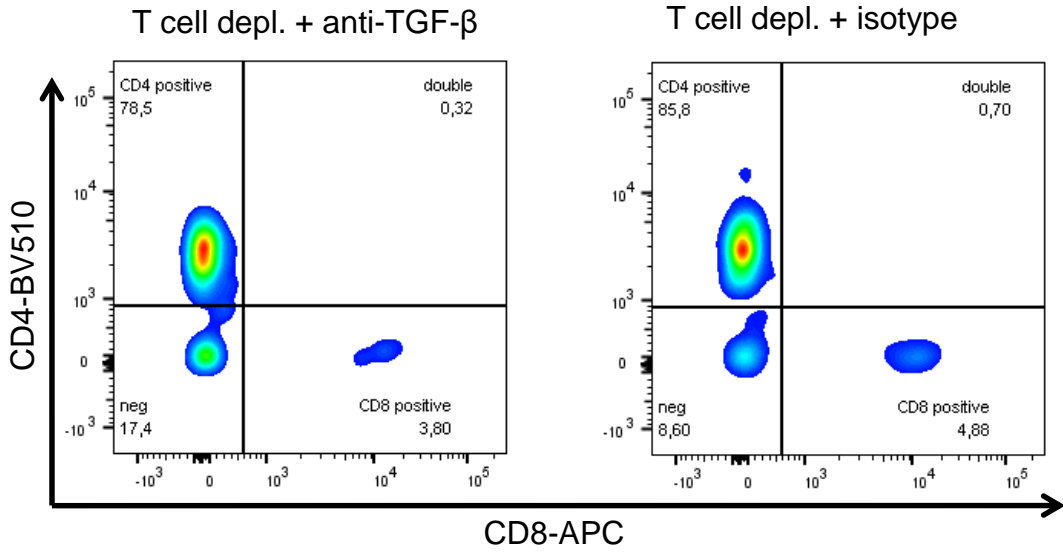

## B

after T cell depletion

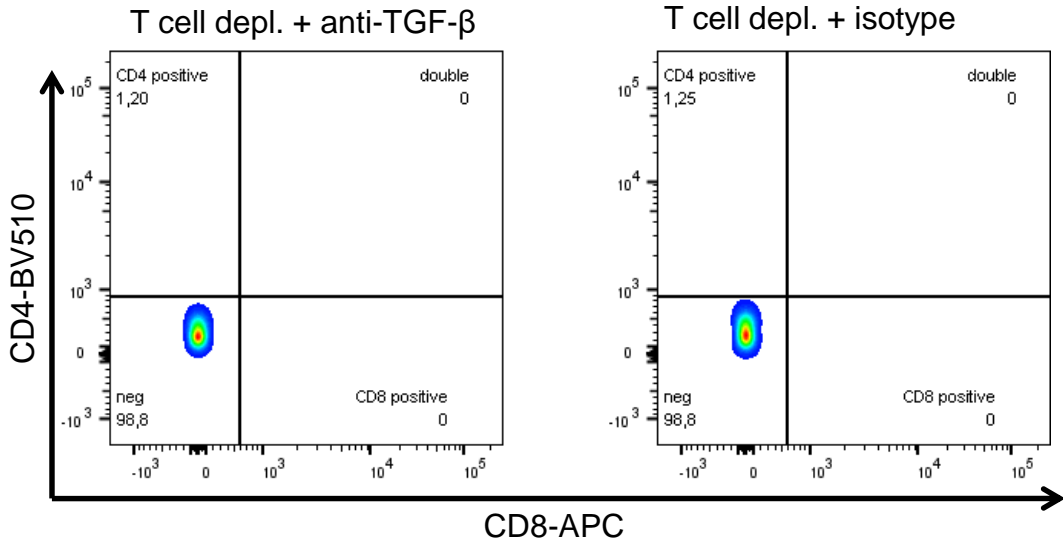

# Supplementary Figure S6

A

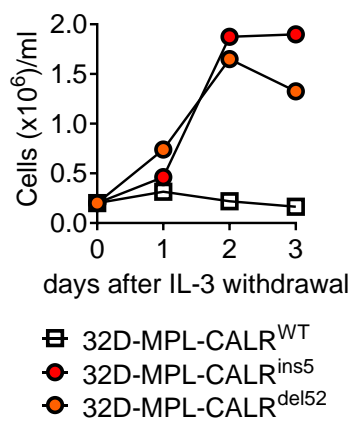

B

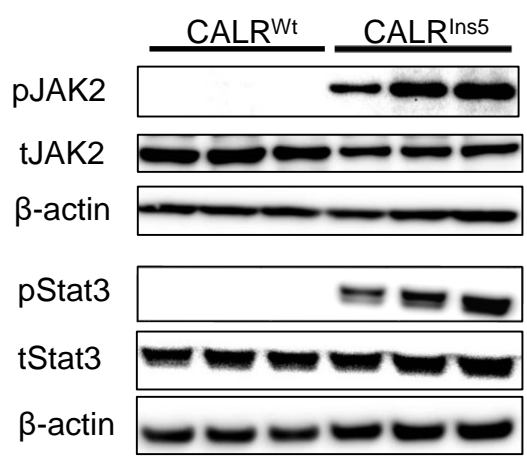

C

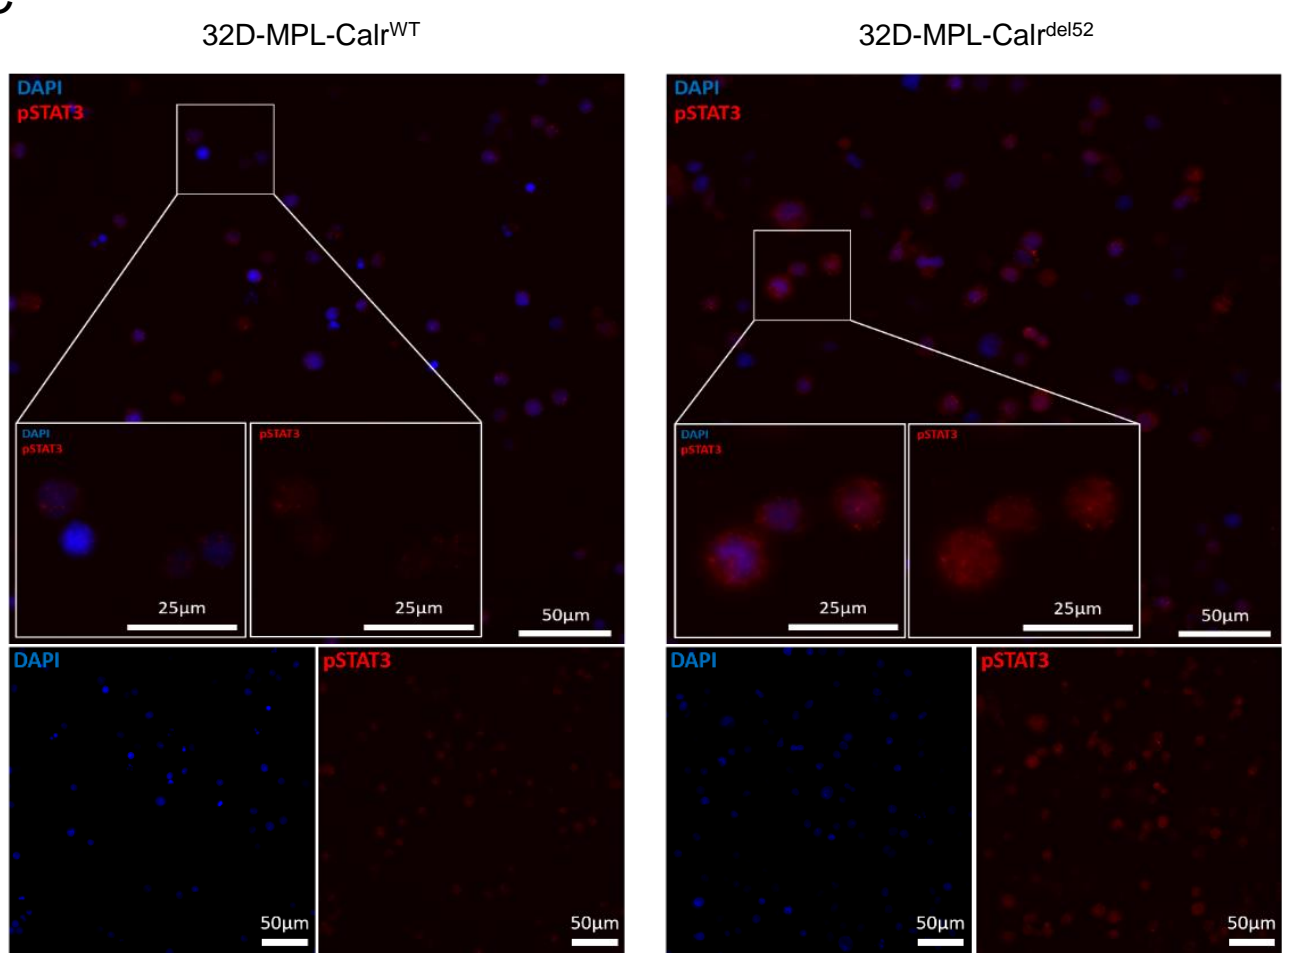

# Supplementary Figure S7

**A**

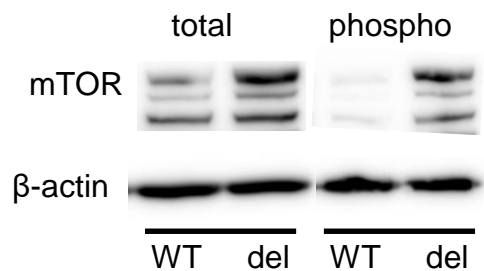

**B**

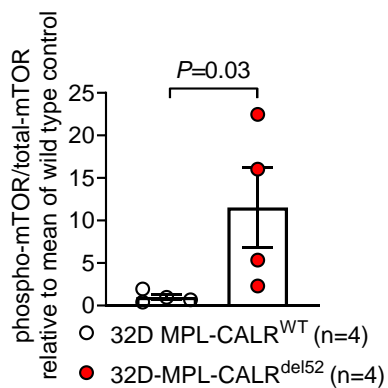

**C**

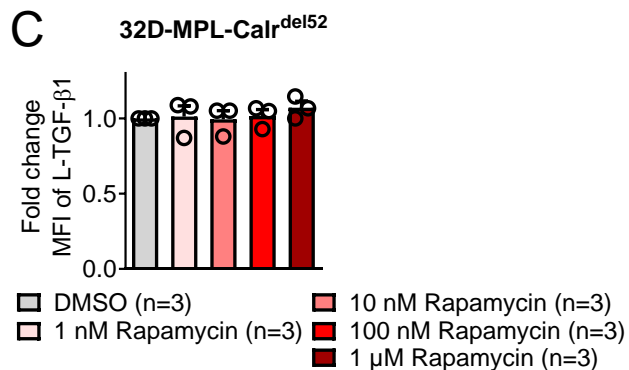

**D**

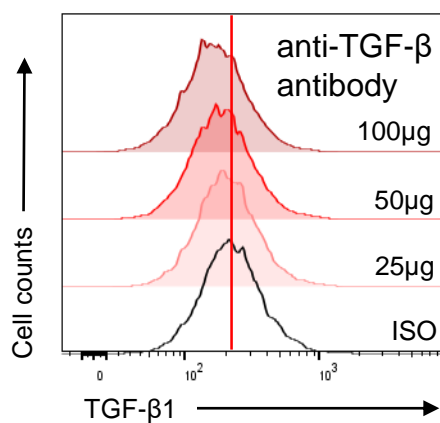

**E**

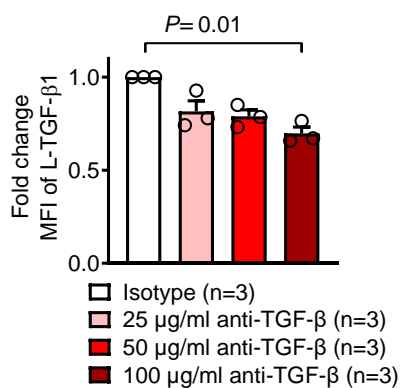

# Supplementary Figure S8

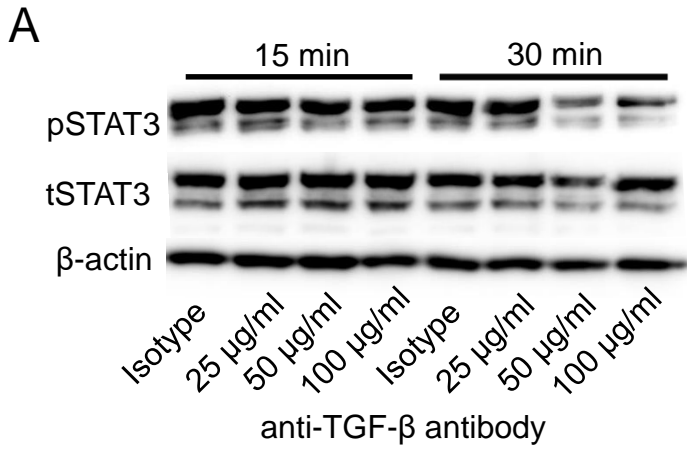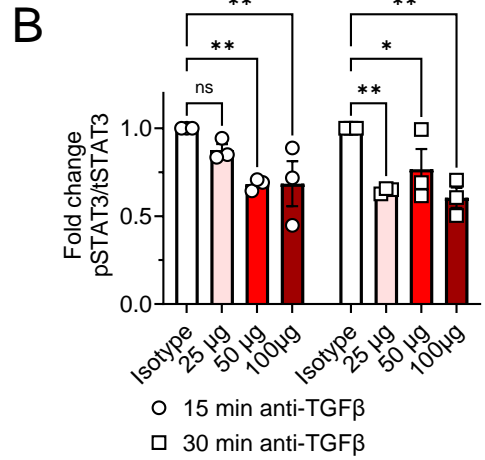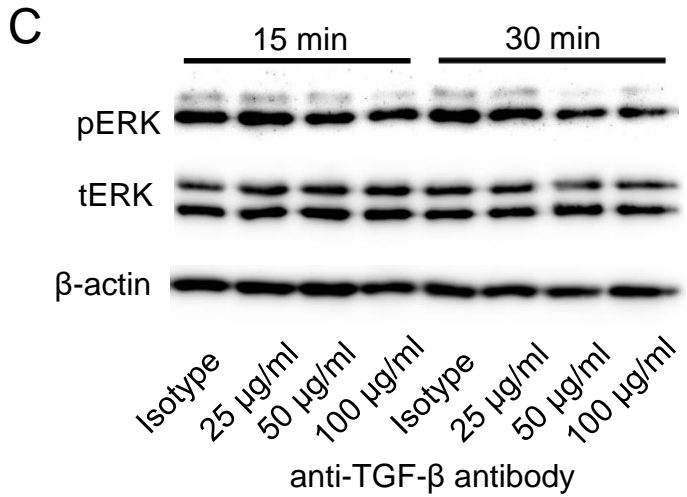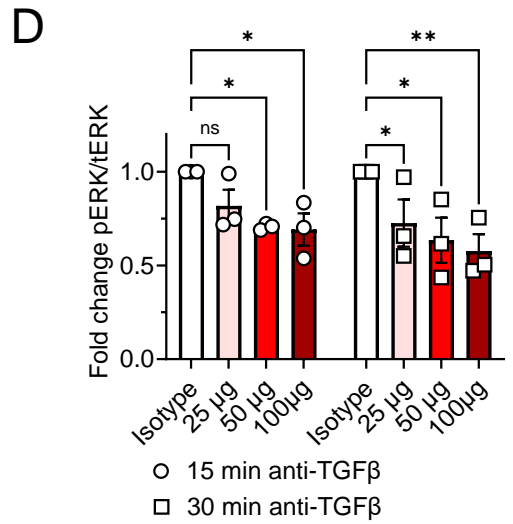



# Supplementary Figure S9

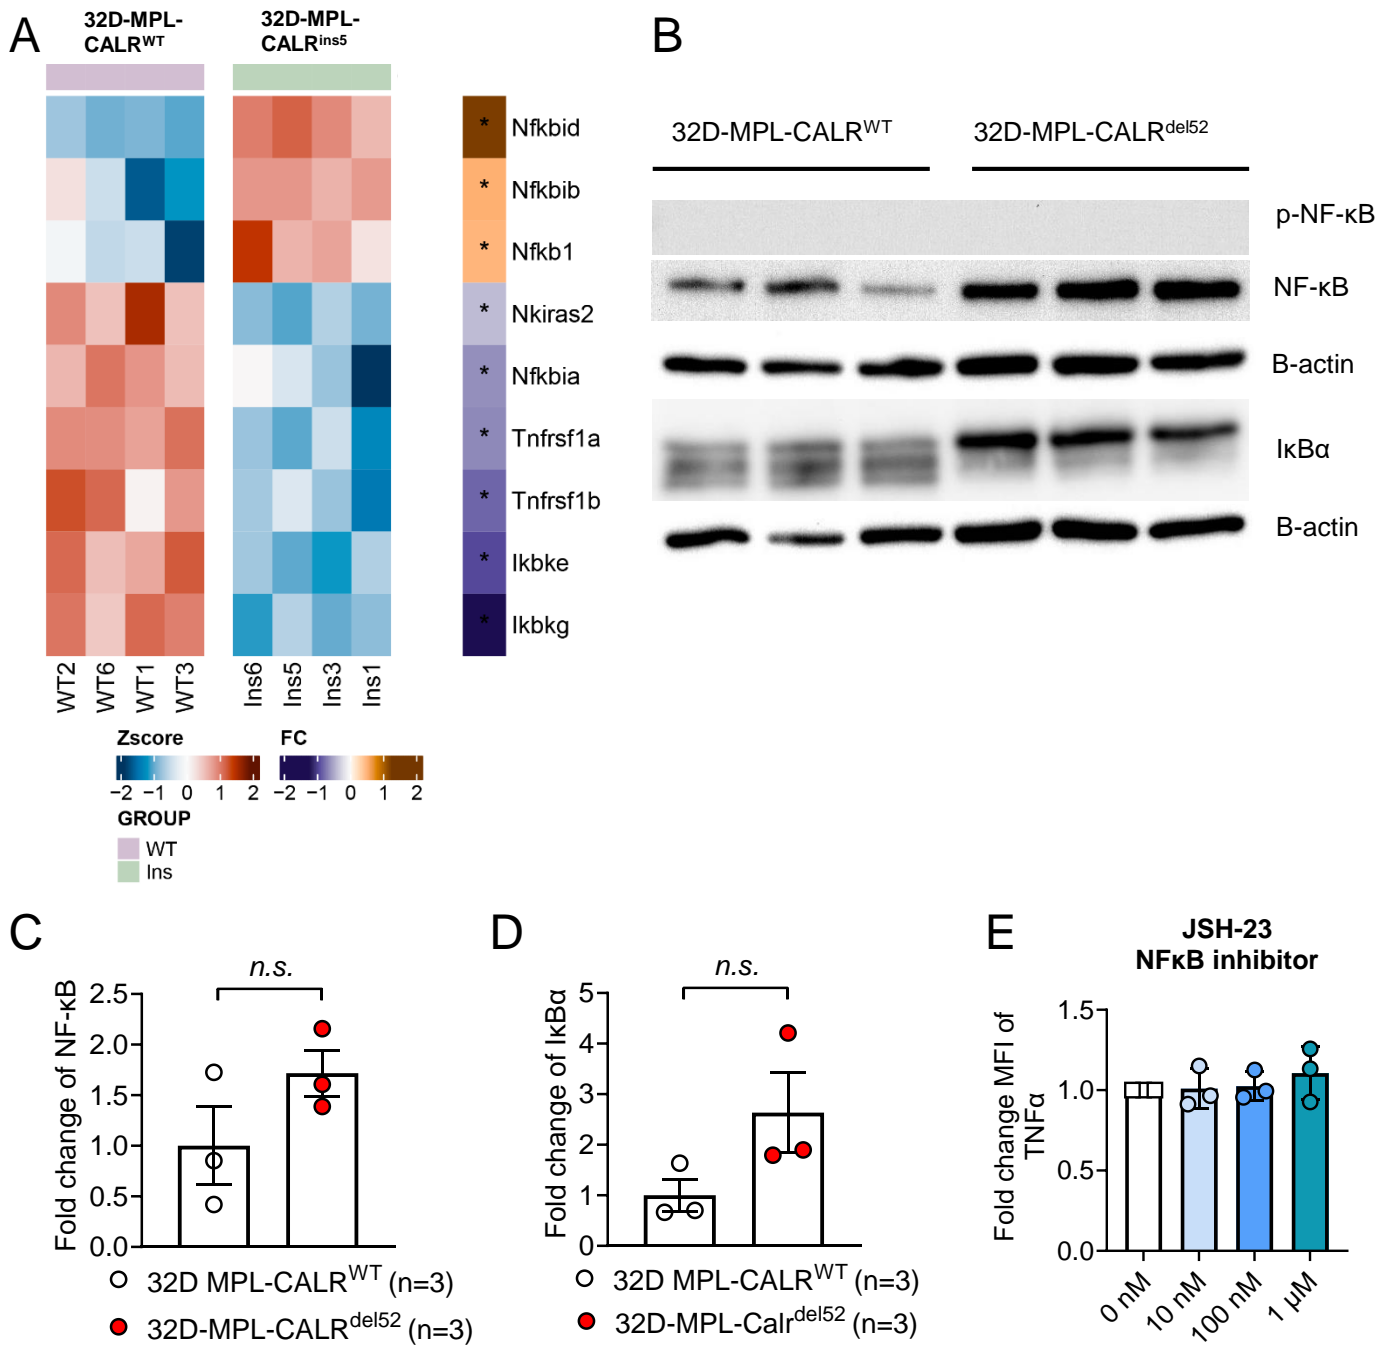

# Supplementary Figure S10

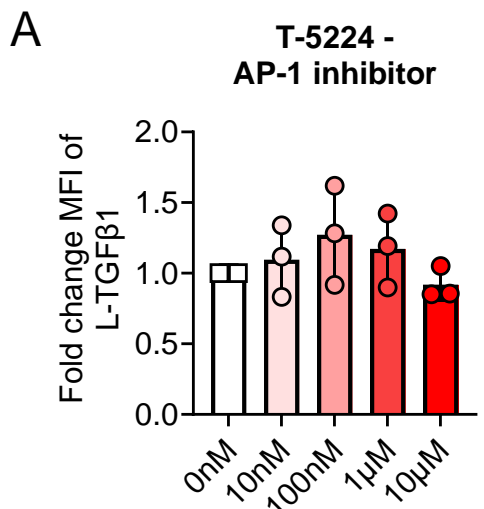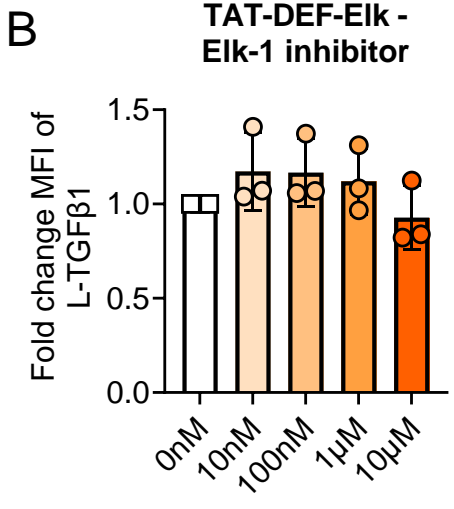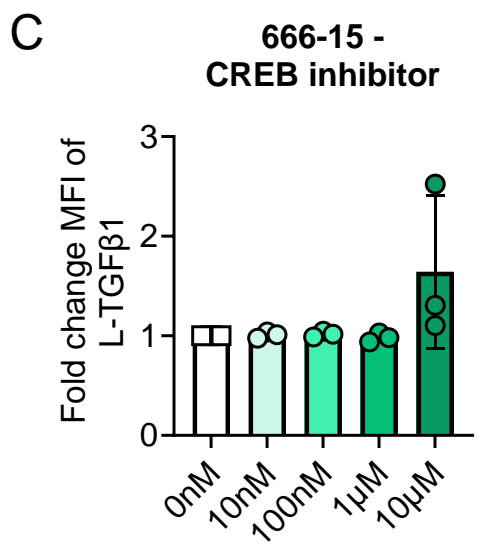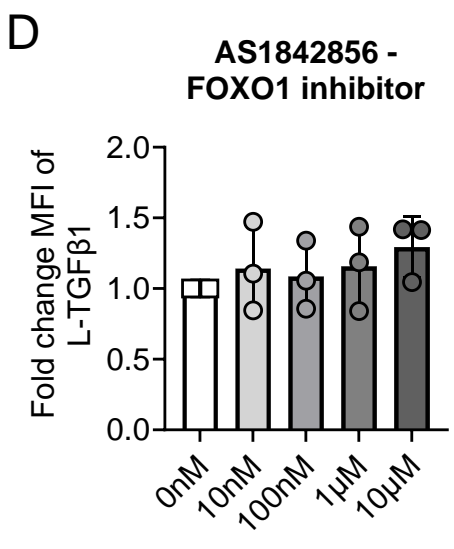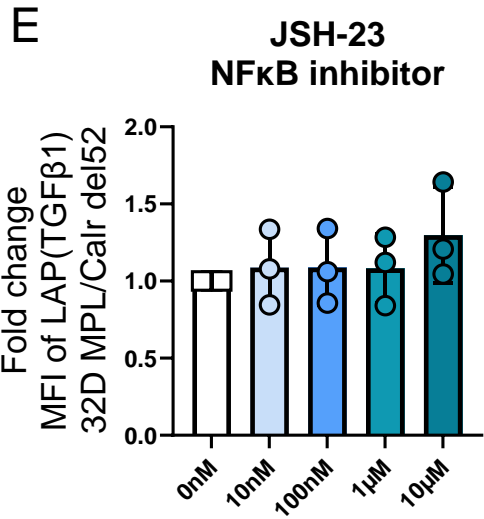

# Supplementary Figure S11

## A

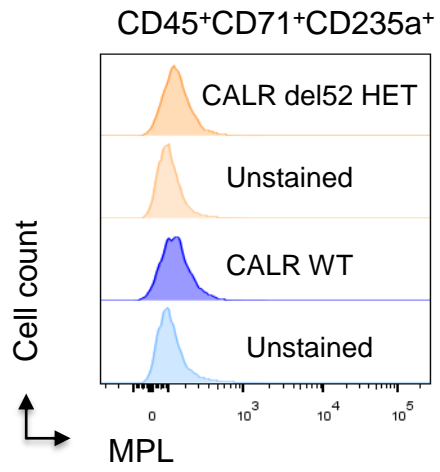

## B

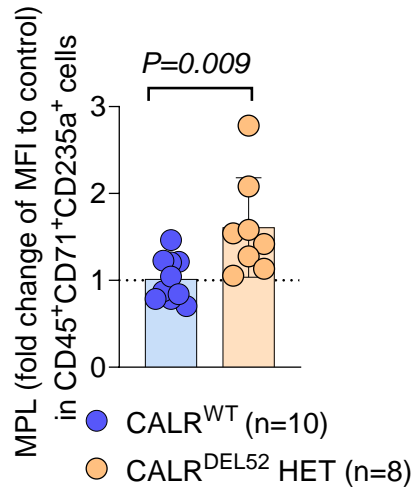

# Supplementary Figure S12

Progeny pathway annotation –  
GSE214361

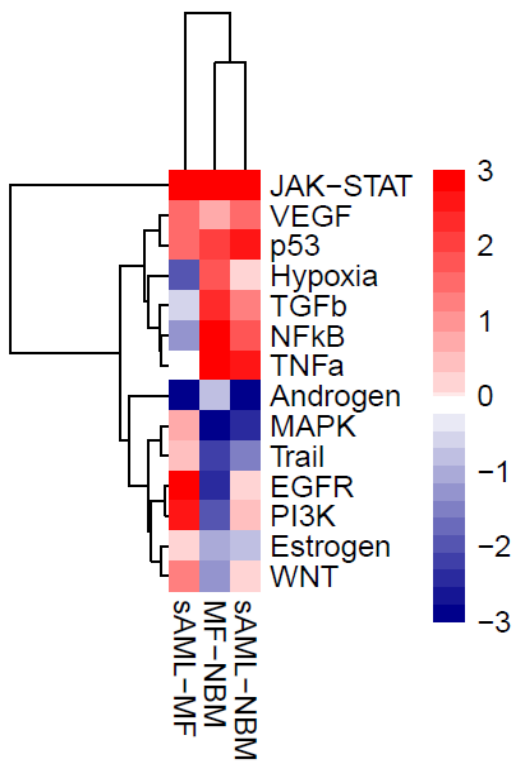

# Supplementary Figure S13

Representative gating of patient bone marrow cells (Fig. 8A, B)

**A**

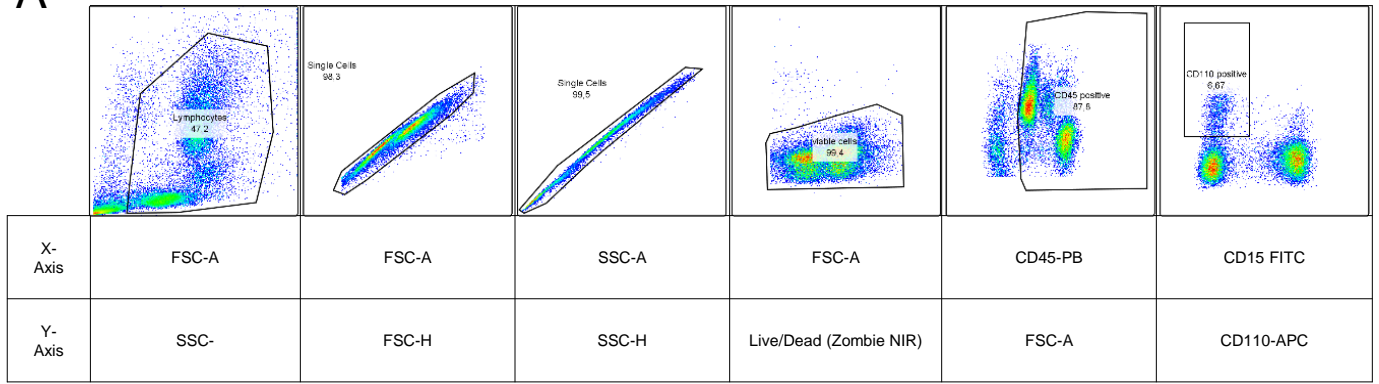

Representative gating of patient bone marrow cells (Fig. 8C, D)

**B**

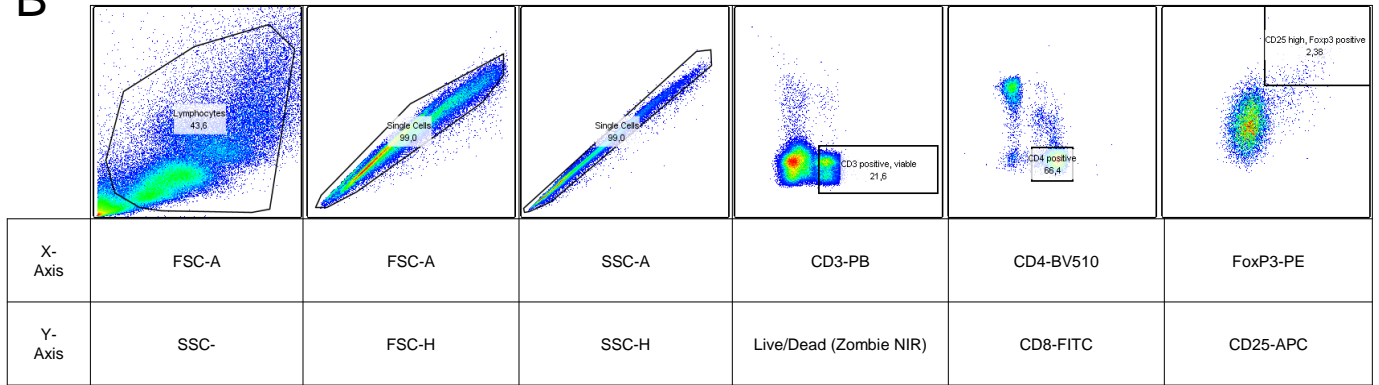

# Supplementary Figure S14

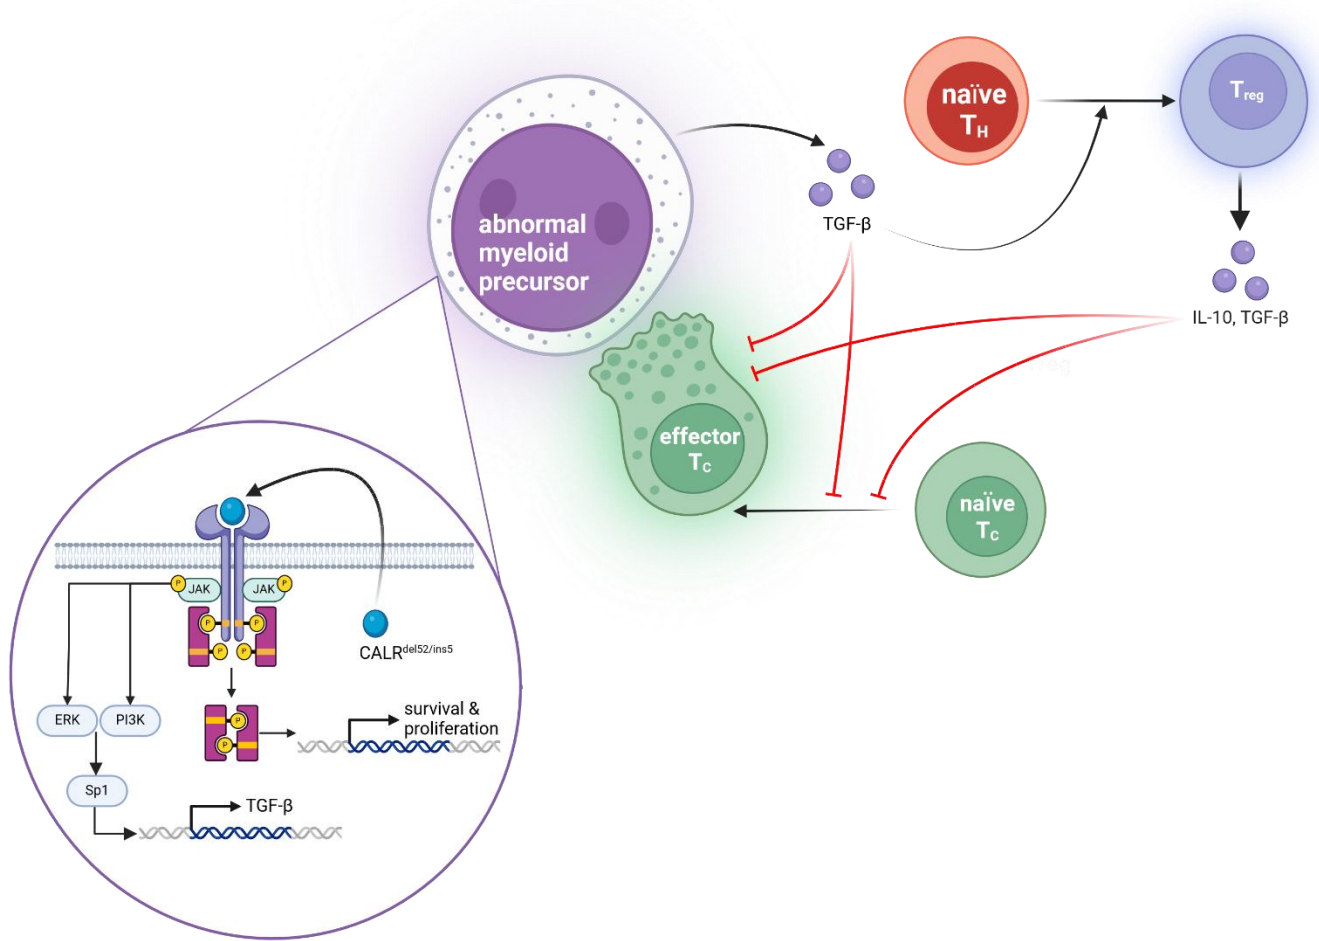

## Supplementary Figure legends:

### Supplementary Figure S1: Oncogenic JAK signaling induces TGF- $\beta$ 1 expression

(A, B) Volcano plot showing differentially regulated genes (A) and heat map showing relative expression of genes involved in TGF- $\beta$  signaling (B) in 32D-MPL-CALR<sup>WT</sup> cells compared to 32D-MPL-CALR<sup>ins5</sup> cells. RNA was isolated from four independent IL3 starvations for each group. Differential gene expression analysis was performed with the linear model-based approach (limma R package). (C-E) Scatter plot showing fold change MFI of L-TGF- $\beta$ 1 on Ba/F3-MPL-CALR<sup>WT</sup>, -CALR<sup>ins5</sup>, -CALR<sup>del52</sup> cells (C); 32D-MPL-Jak2<sup>WT</sup>, -Jak2<sup>V617F</sup> cells (D); BA/F3-MPL-JAK2<sup>V617F</sup> cells treated with indicated concentration of ruxolitinib overnight (E). Pooled data from six (C), four (D) and five (E) replicates. *P* values were calculated using ordinary one-way ANOVA (C, E) and unpaired Student's *t*-test (D).

### Supplementary Figure S2: Bone morphogenetic protein (BMP) signaling molecules are not induced by oncogenic JAK signaling

Heat map showing expression profile of MPL-CALR<sup>WT/ins5</sup> transduced 32D cells. Relative expression of selective BMP signaling pathway molecules are shown. Color codes represents the Z-score log<sub>2</sub> intensity. RNA was harvested from four independent IL3-starved cell cultures. Differential gene expression analysis was performed with the linear model-based approach (limma R package).

### Supplementary Figure S3: Bone marrow transduced with CALR<sup>del52</sup> and MPL induces MPN phenotype in mice

(A-D) Scatter plot showing white blood cell (WBC) count (A), red blood cell count (RBC) (B), hemoglobin concentration (HGB) (C) and hematocrit (HCT) (D) in mice on day 20 post injection of bone marrow cells transduced with empty vector control or CALR<sup>del52</sup>-MPL. Data from one representative experiment. (E) Heat map depicting enrichments of cell type programs (= gene sets = top 50 DEGs per cell type cluster) (rows) with gene signatures (columns) previously defined for mouse bone marrow (1-3). Enrichments are calculated by hypergeometric test (-log<sub>10</sub> FDR-adjusted *P*-values).

### Supplementary Figure S4: TGF- $\beta$ regulated TNF $\alpha$ expression in lymphoid cells

(A) Scatter plot showing TNF- $\alpha$  expression in the lymphoblast cell line EL-4 after 48h treatment with indicated concentration of TGFBR-1 inhibitor RepSOX and TGF- $\beta$  (10 ng/ml) as indicated. (B) Scatter plot showing TNF- $\alpha$  expression in primary CD8<sup>+</sup> T cells activated with CD3/CD28 activator beads for 72h and treated with TGFBR-1 inhibitor RepSOX (0.1  $\mu$ M) and TGF- $\beta$  (10 ng/ml), if indicated, for 24h.

Pooled data from three (A) or five (B) independent experiments. *P*-values were calculated using Friedman test.

**Supplementary Figure S5: In vivo TGF- $\beta$  neutralization improves survival of CALR<sup>del52</sup> driven MPN**

**(A, B)** Flow cytometry plots showing percentage of CD4-BV510 and CD8-APC positive cells in peripheral blood of CALR<sup>del52</sup>-MPL-BM injected mice, before – d10 post BMT (A) and after – d53 post BMT (B) T cell depleting antibody therapy.

**Supplementary Figure S6: validation of oncogenic CALR<sup>del52</sup> induced downstream signaling**

**(A)** XY plot showing density ( $\times 10^6$  cells/ml, Y-axis) of 32D-MPL-CALR<sup>WT</sup>, -CALR<sup>ins5</sup> and -CALR<sup>del52</sup> cells over time (days, X-axis) after IL-3 withdrawal.

**(B)** Western blot showing total-/phospho-JAK2 and total-/phospho-STAT3 with respective  $\beta$ -actin, comparing 32D-MPL-CALR<sup>WT</sup> with 32D-MPL-CALR<sup>del52</sup> cells after overnight IL3 withdrawal. Protein isolated from three independent IL-3 starvations.

**(C)** Representative fluorescence microscopy pictures showing 32D-MPL-CALR<sup>WT</sup> and 32D-MPL-CALR<sup>del52</sup> cells after overnight IL-3 withdrawal. Cells were fixed, permeabilized and stained for phospho-STAT3 (Tyr705). Nuclei were stained with DAPI. Top row shows the merged images with a detailed section. Bottom row shows the single channel images (dapi and pSTAT3-Alexa fluor<sup>TM</sup> 647) of the respective merged image. Scale bar showing 50  $\mu$ m (main pictures) and 25  $\mu$ m (detailed section).

**Supplementary Figure S7: Impact of mTOR inhibition on TGF- $\beta$  production:**

**(A, B)** Western blot (A) and relative quantification (B) showing total- and phospho-mTOR with respective  $\beta$ -actin as loading control in 32D-MPL-CALR<sup>WT</sup> or -MPL-CALR<sup>del52</sup> cells, as indicated. Protein was isolated from four independent IL3 starvations. *P* values were calculated using Mann-Whitney test.

**(C)** Scatter plot showing fold change in MFI of L-TGF- $\beta$ 1 on 32D-MPL-CALR<sup>del52</sup> after overnight treatment with indicated concentrations of mTOR inhibitor rapamycin. Pooled data from three individual experiments. *P* values were calculated using Kruskal-Wallis test.

**(D, E)** Representative Histogram (D) and scatter plot (E) showing fold change in MFI of L-TGF- $\beta$ 1 on 32D-MPL-CALR<sup>del52</sup> cells after overnight treatment with indicated concentration of anti-TGF- $\beta$  neutralizing antibody. Pooled data from three individual experiments. *P* values were calculated using Kruskal-Wallis test.



### **Supplementary Figure S8: anti-TGFβ antibody treatment reduces STAT3 and ERK signaling activity**

**(A, B)** Western blot (A) and relative quantification (B) of phospho (Y705)-STAT3 / total-STAT3. Protein was isolated from 32D-MPL-CALR<sup>del52</sup> cells that were treated with anti-TGFβ antibody or Isotype for 15 or 30 minutes. **(C, D)** Western blot (C) and relative quantification (D) of phospho-ERK / total-ERK. Protein was isolated from 32D-MPL-CALR<sup>del52</sup> cells that were treated with anti-TGFβ antibody or Isotype for 15 or 30 minutes. Pooled data from three individual experiments. *P* values were calculated using ordinary one-way ANOVA.

### **Supplementary Figure S9: Impact of MPL-CALR<sup>WT/ins5</sup> on NF-κB signaling**

**(A)** Heat map showing expression profile of MPL-CALR<sup>WT/ins5</sup> transduced 32D cells. Relative expression of NF-κB signaling pathway molecules are shown. Color codes represents the Z-score log2 intensity. RNA was harvested from four independent IL3-starved cell cultures. Differential gene expression analysis was performed with the linear model-based approach (limma R package).

**(B-D)** Western blot (B) and relative quantification of total NF-κB (C) and total IκBα (D). Protein was isolated from 32D-MPL-CALR<sup>WT/del52</sup> cells after overnight IL-3 starvation. Pooled data from three independent experiments. *P* values were calculated using Mann-Whitney test.

**(E)** Scatter plot showing fold change of TNFα expression in 32D-MPL-Calr<sup>del52</sup> cells treated with indicated concentrations of NF-κB inhibitor (JSH-23).

Pooled data from three independent experiments. *P* values were calculated using Friedman test.

### **Supplementary Figure S10: Impact of inhibitors downstream of ERK and/or PI3K on L-TGFβ1 expression**

**(A-E)** Scatter plot showing expression of L-TGFβ1 on 32D-MPL-Calr<sup>del52</sup> cells after overnight treatment with selected transcription factor inhibitors downstream of ERK and/or PI3K. **(A)** AP-1 specific inhibitor (T-5224), **(B)** Elk-1 specific inhibitor (TAT-DEF-Elk), **(C)** CREB specific inhibitor (666-15), **(D)** FOXO1 specific inhibitor AS1842856 and **(E)** NF-κB specific inhibitor (JSH-23). Pooled data of three independent experiments. *P* values were calculated using Kruskal-Wallis test.

### **Supplementary Figure S11: MPL expression in human erythroid progenitor cells**

**(A)** Histogram plots showing increased MPL surface expression in iPSC-derived CALR<sup>DEL52</sup> mutated CD45<sup>+</sup>CD71<sup>+</sup>CD235a<sup>+</sup> erythroid progenitors in comparison to isogenic CALR<sup>WT</sup> cells.

**(B)** Scatter plot showing relative MFI of MPL surface expression on CALR<sup>WT</sup> or CALR<sup>DEL52</sup> iPSC-derived CD45<sup>+</sup>CD71<sup>+</sup>CD235a<sup>+</sup> erythroid progenitor cells, fold change to MFI of unstained

control. CALR<sup>DEL52</sup> iPSC and CRISPR repaired CALR<sup>WT</sup> control were generated from one CALR<sup>del52</sup> MPN patient. Each dot represents an individual experiment. The *P* value was calculated using unpaired Student's t test

#### **Supplementary Figure S12: Progeny pathway annotation**

Heat map showing fold change in wmean for a selected set of differentially regulated gene pathways. DecoupleR R package with the progeny annotation was applied to each set group (NBM, MF and sAML) from the public data set GSE214361 and each group was weighted against each other (4).

#### **Supplementary Figure S13: Gating strategy for patient derived bone marrow samples**

**(A)** Representative gating for viable, CD45<sup>+</sup>CD110<sup>+</sup> cells in bone marrow derived monocytes of patient / healthy donor. **(B)** Representative gating for viable CD3<sup>+</sup> CD4<sup>+</sup> CD25<sup>high</sup> FoxP3<sup>+</sup> T<sub>reg</sub> cells in bone marrow derived monocytes of patient / healthy donor.

#### **Supplementary Figure S14: Graphical abstract**

The simplified sketch shows the proposed mechanism of TGF- $\beta$  mediated immune escape in CALR<sup>del52</sup> driven MPN. Secreted CALR<sup>del52</sup> binds to thrombopoietin receptor and induce intracellular downstream signaling via JAK/STAT, PI3K- and ERK-signaling. JAK/STAT signaling promotes cell survival and proliferation. PI3K and ERK activity promotes Sp1 activation which leads to transcription of TGF- $\beta$ . Secreted and activated TGF- $\beta$  has multiple effects on the BM microenvironment. It inhibits differentiation of naïve CD8<sup>+</sup> T cells towards effector T cells while promoting CD4<sup>+</sup> T cells to differentiate towards a T<sub>reg</sub> phenotype (reviewed in (5)). TGF- $\beta$  directly suppresses cytotoxic effector T cell function and thereby promotes immune escape. The figure was created using BioRender.com.

## Supplementary Tables:

**Supplementary Table S1 List of patient characteristics (Freiburg MPN cohort)**

| Internal NO. | Age at sampling [years] | Gender | Phenotype / Genotype                                                                             | Disease Burden in BM                                                                                      | Depicted in Fig. |
|--------------|-------------------------|--------|--------------------------------------------------------------------------------------------------|-----------------------------------------------------------------------------------------------------------|------------------|
| P13          | 55                      | Male   | PV on spec, TET2 mutation,                                                                       | 1.3% CD34 <sup>+</sup> , CD117 <sup>+</sup>                                                               | 7D, 8C           |
| P14          | 69                      | Female | Post-PV-myelofibrosis, JAK2 <sup>V617F</sup> - and TET2 mutation                                 | 1.0% CD34 <sup>+</sup> , CD117 <sup>+</sup>                                                               | 8A, 7D, 8C       |
| P15          | 56                      | Female | MPN with thrombocytosis, JAK2 <sup>V617F</sup> - and MPL mutation                                | No blasts                                                                                                 | 8A, 7D, 8C       |
| P16          | 63                      | Male   | MPN/MDS, ASXL1, CBLB (2 Mutationen), CUX1, RUNX1 und SRSF2 mutations                             | 1.0% CD34 <sup>+</sup> bzw 3.0% CD14 <sup>+</sup>                                                         | 8A, 7D, 8C       |
| P17          | 31                      | Female | ET, JAK2 <sup>V617F</sup> mutation                                                               | 2.5% CD34 <sup>+</sup> , CD117 <sup>+</sup>                                                               | 8A, 7D, 8C       |
| P18          | 66                      | Male   | ET, JAK2 <sup>V617F</sup> mutation                                                               | 1.0% CD34 <sup>+</sup> , CD117 <sup>+</sup>                                                               | 8A, 7D, 8C       |
| P19          | 85                      | Male   | MPN with increased Megakaryopoiesis, CALR <sup>del</sup> and TET2 mutation                       | 0,3% CD34 <sup>+</sup> and 0,8% CD117 <sup>+</sup>                                                        | 8A, 7D           |
| P21          | 39                      | Female | MPN, JAK2 <sup>V617F</sup> mutation                                                              | 2% CD117 <sup>+</sup> and partially CD34 <sup>+</sup>                                                     | 8A               |
| P22          | 78                      | Female | MPN with increase Erythro- and Megakaryopoiesis, ASXL1, JAK2 <sup>V617F</sup> and TET2 mutation. | 0.3% CD34 <sup>+</sup> , CD117 <sup>+</sup>                                                               | 8A, 8C           |
| P23          | 64                      | Male   | sAML from MPN, JAK2 <sup>V617F</sup> and RUNX1 mutation                                          | 10% CD117 <sup>+</sup> and partially CD34 <sup>+</sup> , 2 <sup>nd</sup> population 40% CD14 <sup>+</sup> | 8A, 8C           |
| P24          | 64                      | Male   | MPN with Erythro- and Megakaryo- and Leukopoiesis, JAK2 <sup>V617F</sup> mutation                | 2.5% CD34 <sup>+</sup> , CD117 <sup>+</sup>                                                               | 8A, 8C           |
| P40          | 38                      | Male   | Calr <sup>del52</sup> and TET2 mutation                                                          | Mutation in 44% of BM cells                                                                               | 8A               |
| P44          | 72                      | Male   | ET with Calr <sup>del52</sup> and TET2 mutation                                                  | Calr <sup>del52</sup> 59% VAF                                                                             | 8A, 8C           |

**Supplementary Table S2 Antibodies used for: Flow cytometry – Western blot – in-vivo**

| Flow cytometry antibodies |             |            |                        |          |                 |               |
|---------------------------|-------------|------------|------------------------|----------|-----------------|---------------|
| Target                    | Label       | Reactivity | Isotype                | Dilution | RRID or Cat. No | Vendor        |
| LAP(TGF-β1)               | PE          | Mouse      | Mouse IgG1, κ          | 1:50     | AB_10720866     | BioLegend     |
| CD45                      | BV785       | Mouse      | Rat IgG2b, κ           | 1:100    | AB_2564590      | BioLegend     |
| Lineage cocktail          | PB          | Mouse      | Rat IgG2b, Rat IgG2a   | 1:50     | AB_11126168     | BioLegend     |
| CD34                      | Percp-Cy5.5 | Mouse      |                        | 1:50     | AB_2260023      | BioLegend     |
| CD38                      | APC         | Mouse      | Rat IgG2a,κ            | 1:50     | AB_312933       | BioLegend     |
| CD90                      | PE-Cy7      | Mouse      | Rat IgG2b, κ           | 1:50     | AB_2201290      | BioLegend     |
| Perforin                  | APC         | Mouse      | Rat / IgG2a, kappa     | 1:100    | AB_469514       | invitrogen    |
| Granzyme B                | FITC        | Mouse      | Rat / IgG2a, kappa     | 1:100    | AB_10732989     | invitrogen    |
| TNF-α                     | PE          | Mouse      | Rat IgG1, kappa        | 1:100    | AB_466198       | invitrogen    |
| CD8                       | PB          | Mouse      | Rat IgG2a, κ           | 1:100    | AB_493425       | BioLegend     |
| CD4                       | BV510       | Mouse      | Rat IgG2b, κ           | 1:100    | AB_2564587      | BioLegend     |
| Foxp3                     | APC         | Mouse      | Rat IgG2a kappa        | 1:100    | AB_469457       | eBioscience   |
| CD25                      | PE          | Mouse      | Rat IgG1, λ            | 1:100    | AB_312856       | BioLegend     |
| CD3                       | PB          | Mouse      | Rat IgG2b,κ            | 1:100    | AB_493644       | BioLegend     |
| CD8                       | APC-H7      | Mouse      | Rat IgG2a, κ           | 1:100    | AB_1645237      | BD Pharmingen |
| CD69                      | APC         | Mouse      | Armenian hamster / IgG | 1:100    | AB_1210795      | eBioscience   |
| CD3                       | PE-Cy7      | Mouse      | Rat IgG2b, κ           | 1:100    | AB_1732057      | BioLegend     |
| CD4                       | FITC        | Mouse      | Rat IgG2b, κ           | 1:100    | AB_312690       | BioLegend     |
| Foxp3                     | eF450       | Mouse      | Rat / IgG2a, kappa     | 1:50     | AB_1518812      | eBioscience   |
| CD8                       | APC         | Mouse      | Rat IgG2a, κ           | 1:100    | AB_469336       | eBioscience   |

| LAP(TGF-β1)                                            | PE                            | Human             | Mouse IgG1, κ         | 1:25                            | AB_10645520             | BioLegend      |
|--------------------------------------------------------|-------------------------------|-------------------|-----------------------|---------------------------------|-------------------------|----------------|
| CD45                                                   | PB                            | Human             | Mouse IgG1,κ          | 1:100                           | AB_2174123              | BioLegend      |
| CD110                                                  | APC                           | Human             | Mouse IgG2b, κ        | 1:50                            | AB_2750426              | BioLegend      |
| CD3                                                    | PB                            | Human             | Mouse IgG1, κ         | 1:100                           | AB_2563422              | BioLegend      |
| CD4                                                    | BV510                         | Human             | Mouse IgG1, κ         | 1:100                           | AB_2566017              | BioLegend      |
| CD8                                                    | Alexa Fluor(R) 488            | Human             | Mouse IgG1, κ         | 1:100                           | AB_756152               | BioLegend      |
| Foxp3                                                  | PE                            | Human             | Rat IgG2a, kappa      | 1:100                           | AB_1518782              | eBioscience    |
| CD25                                                   | APC                           | Human             | Mouse IgG1, κ         | 1:100                           | AB_314280               | BioLegend      |
| CD71                                                   | FITC                          | Human             | Mouse BALB/c IgG2a, κ |                                 | AB_10896151             | BD Pharmingen  |
| CD235a                                                 | PE                            | Human             | Mouse IgG2a           |                                 | 21812354                | Immunotool     |
| <b>Western blot and immune fluorescence antibodies</b> |                               |                   |                       |                                 |                         |                |
| <b>Target</b>                                          | <b>Molecular weight [kDa]</b> | <b>Reactivity</b> | <b>Isotype</b>        | <b>Dilution / block buffer.</b> | <b>RRID or Cat. No.</b> | <b>Vendor</b>  |
| Actin                                                  | 45                            | Mouse             | Rabbit IgG            | 1:2000, 5% BSA                  | AB_2223172              | Cell Signaling |
| Actin 8H10D10                                          | 45                            | Mouse             | Mouse IgG             | 1:2000, 5% BSA                  | AB_2242334              | Cell Signaling |
| STAT3                                                  | 79; 86                        | Mouse             | Rabbit IgG            | 1:1000, 5% BSA                  | AB_331269               | Cell Signaling |
| Phospho-STAT3 (Tyr705)                                 | 79; 86                        | Mouse             | Rabbit IgG            | 1:1000, 5% BSA                  | AB_331586               | Cell Signaling |
| ERK (p44/42)                                           | 42; 44                        | Mouse             | Rabbit IgG            | 1:1000, 5% BSA                  | AB_330744               | Cell Signaling |
| Phospho- ERK (Thr202/ Tyr204)                          | 42; 44                        | Mouse             | Rabbit IgG            | 1:1000, 5% BSA                  | AB_331646               | Cell Signaling |
| mTOR (7C10)                                            | 289                           | Mouse             | Rabbit IgG            | 1:1000, 5% BSA                  | AB_2105622              | Cell Signaling |
| Phospho mTOR (Ser2448)                                 | 289                           | Mouse             | Rabbit IgG, D9C2      | 1:1000, 5% milk                 | AB_1069152              | Cell Signaling |

|                                               |              |                               |                       |                                 |                        |                          |
|-----------------------------------------------|--------------|-------------------------------|-----------------------|---------------------------------|------------------------|--------------------------|
| Goat anti Mouse Secondary Antibody, HRP IgA   | secondary    | Anti-mouse IgG                | Goat IgA – HRP linked | 1:2000 – 1:4000, 5% BSA or milk | AB_138466              | Thermo Fisher Scientific |
| Anti rabbit IgG, HRP linked Antibody          | secondary    | Anti rabbit IgG               | Goat, HRP linked      | 1:2000 – 1:4000, 5% BSA or milk | AB_2099233             | Cell Signaling           |
| Goat-anti-rabbit IgG (H+L) AlexaFluorPlus 647 | secondary    | Anti-rabbit                   | AlexaFluor647         | 1:100, 5% BSA and % Goat Serum  | AB_2633282             | Invitrogen               |
| <b>In vivo antibodies</b>                     |              |                               |                       |                                 |                        |                          |
| <b>Target</b>                                 | <b>Clone</b> | <b>Reactivity</b>             | <b>Isotype</b>        | <b>Concent</b>                  | <b>RRID or Cat.No.</b> | <b>Vendor</b>            |
| Bulk anti-TGF- $\beta$ 1,2,3 In Vivo          | 1D11.1       | Human, Mouse, Bovine, Chicken | Mouse IgG1            | 10 $\mu$ g/g <sub>BW</sub>      | AB_2921436             | Ichorbio                 |
| Mouse IgG1 Isotype Control                    | HKSP         | -                             | Mouse IgG1            | 10 $\mu$ g/g <sub>BW</sub>      | AB_2921382             | Ichorbio                 |
| Anti-mouse CD8 <i>in vivo</i>                 | YTS-169      | Mouse                         | Rat IgG2b             | 12,5 $\mu$ g/g <sub>BW</sub>    | AB_2921445             | Ichorbio                 |
| Anti-mouse CD4 <i>in vivo</i>                 | GK1.5        | Mouse                         | Rat IgG2b             | 12,5 $\mu$ g/g <sub>BW</sub>    | AB_2921444             | Ichorbio                 |
| Rat IgG2b Isotype Control <i>in vivo</i>      | 1-2          | -                             | Rat IgG2b             | 12,5 $\mu$ g/g <sub>BW</sub>    | AB_2921378             | Ichorbio                 |

**Supplementary Table S3: Primers used for RT-qPCR**

| Target gene       | Direction | Sequence (5'→3')      | GC [%] | Length | T <sub>M</sub> |
|-------------------|-----------|-----------------------|--------|--------|----------------|
| hu-TGF- $\beta$ 1 | Fwd       | ATTCCTGGCGATACCTCAGC  | 55     | 20     | 59,4           |
| hu-TGF- $\beta$ 1 | Rev       | CGGTAGTGAACCCGTTGATG  | 55     | 20     | 59,4           |
| hu-GAPDH          | Fwd       | GTCAGTGGTGGACCTGACCT  | 60     | 20     | 61,4           |
| hu-GAPDH          | Rev       | TGAGCTTGACAAAGTGGTTCG | 50     | 20     | 57,3           |

**Supplementary Table S4: Expression vectors**

| Name                      | Backbone | Insert (cDNA)              | Selection marker | RRID/parentage           |
|---------------------------|----------|----------------------------|------------------|--------------------------|
| pMIG                      | pMSCV    | empty                      | IRES-GFP         | RRID:Addgene_9044        |
| pMIG-CALR <sup>WT</sup>   | pMSCV    | Human CALR <sup>WT</sup>   | IRES-GFP         | Provided by Ann Mullally |
| pMIG-CALR <sup>ins5</sup> | pMSCV    | Human CALR <sup>ins5</sup> | IRES-GFP         | Provided by Ann Mullally |

|                             |       |                                     |                                |                            |
|-----------------------------|-------|-------------------------------------|--------------------------------|----------------------------|
| pMIG-CALR <sup>del52</sup>  | pMSCV | Human <i>CALR</i> <sup>del52</sup>  | IRES-GFP                       | Provided by Ann Mullally   |
| pMSCV-MPL                   | pMSCV | Human <i>MPL</i>                    | PKG-hygromycin resistance gene | Provided by Ann Mullally   |
| pMIG-JAK2 <sup>WT</sup>     | pMSCV | Human <i>JAK2</i> <sup>WT</sup>     | IRES-GFP                       | Provided by Justus Duyster |
| pMIG-JAK2 <sup>V617F</sup>  | pMSCV | Human <i>JAK2</i> <sup>V617F</sup>  | IRES-GFP                       | Provided by Justus Duyster |
| pMSCV-EpoR                  | pMSCV | Human <i>EPOR</i>                   | neomycin resistance gene       | In-house                   |
| pMIG-STAT3 <sup>WT</sup>    | pMX   | Human <i>STAT3</i> <sup>WT</sup>    | IRES-GFP                       | In-house                   |
| pMIG-STAT3 <sup>V640F</sup> | pMX   | Human <i>STAT3</i> <sup>V640F</sup> | IRES-GFP                       | In-house                   |
| pGL4.73[hRluc/SV40]         | pGL4  | SV40 early enhancer, <i>rRluc</i>   | renilla luciferase             | Promega (E691A)            |
| pGL3-TGFb1                  | pGL3  | Human TGFb1 promoter                | luciferase                     | RRID:Addgene_101762        |

## References:

1. Stumpf PS, Du X, Imanishi H, Kunisaki Y, Semba Y, Noble T, *et al.* Transfer learning efficiently maps bone marrow cell types from mouse to human using single-cell RNA sequencing. *Communications biology* **2020**;3:736
2. Harris BD, Lee J, Gillis J. A meta-analytic single-cell atlas of mouse bone marrow hematopoietic development. *BioRxiv* **2021**:2021.08. 12.456098
3. Lee RD, Munro SA, Knutson TP, LaRue RS, Heltemes-Harris LM, Farrar MA. Single-cell analysis identifies dynamic gene expression networks that govern B cell development and transformation. *Nature communications* **2021**;12:6843
4. Kong T, Laranjeira AB, Yang K, Fisher DA, Yu L, Poittevin De La Frégonnière L, *et al.* DUSP6 mediates resistance to JAK2 inhibition and drives leukemic progression. *Nature Cancer* **2023**;4:108-27
5. Dahmani A, Delisle J-S. TGF- $\beta$  in T cell biology: implications for cancer immunotherapy. *Cancers* **2018**;10:194
